# Supplementary material
Source: Springer Nature journal article supplement (https://www.springermedizin.de/resource/supplementary/12913_2008_833_MOESM4_ESM.pdf/9535680)
Supplement: MOESM4 [file 9535680]

## ***References to excluded studies***

### **Abe 2001**

Abe T, Tsuchida N, Ishibashi H, Yamamoto S. [Comparison between the short program and the long program of post-operative rehabilitation of hip fracture for making the critical path]. [Japanese]. *Nippon Ronen Igakkai Zasshi - Japanese Journal of Geriatrics*.38(4):514-8 2001.

### **Bailey 1998**

Bailey R, Weingarten S, Lewis M, Mohsenifar Z. Impact of clinical pathways and practice guidelines on the management of acute exacerbations of bronchial asthma. *Chest*.113(1):28-33 1998.

### **Board 2000**

Board N, Brennan N, Caplan GA. A randomised controlled trial of the costs of hospital as compared with hospital in the home for acute medical patients.[see comment]. *Australian & New Zealand Journal of Public Health*.24(3):305-11 2000.

### **Du Pen 1999**

DuPen SL, DuPen AR, Polissar N, Hansberry J, Kraybill BM, Stillman M, Panke J, Everly R, Syrjala K. Implementing guidelines for cancer pain management: results of a randomized controlled clinical trial. *J.Clin.Oncol*. 1999;17(1):361.

### **Fine 2003**

Fine MJ, Stone RA, Lave JR, Hough LJ, Obrosky DS, Mor MK, Kapoor WN. Implementation of an evidence-based guideline to reduce duration of intravenous antibiotic therapy and length of stay for patients hospitalized with community-acquired pneumonia: a randomized controlled trial. *Am.J.Med*. 2003;115(5):343.

### **Fridlin 1996**

Fridlin C. Using severity-adjusted data to impact clinical pathways. *Healthcare Information Management* 1996;10(1):23-30.

### **Kagan 2002**

Kagan SH, Chalian AA, Goldberg AN, Rontal ML, Weinstein GS, Prior B, Wolf PF, Weber RS. Impact of age on clinical care pathway length of stay after complex head and neck resection. *Head & Neck*.24(6):545-8; discussion 545 2002.

### **Keetch 1998**

Keetch DW, Buback D. A clinical-care pathway for decreasing hospital stay after radical prostatectomy. *British Journal of Urology* 1998;81(3):398-402.

**Kelly 2000**

Kelly RE, Jr., Wenger A, Horton C, Jr., Nuss D, Croitoru DP, Pestian JP. The effects of a pediatric unilateral inguinal hernia clinical pathway on quality and cost. *Journal of Pediatric Surgery*.35(7):1045-8 2000.

**Kight 1999**

Kight L. Chest pain rule-out MI clinical pathway saves \$183,000. *Hospital case management : the monthly update on hospital-based care planning and critical paths* 1999;7(12):207-210.

**Kim 2001**

Kim MH, Deeb GM, Morady F, Bruckman D, Hallock LR, Smith KA, Karavite DJ, Bolling SF, Pagani FD, Wahr JA, Sonnad SS, Kazanjian PE, Watts C, Williams M, Eagle KA. Effect of postoperative atrial fibrillation on length of stay after cardiac surgery (The Postoperative Atrial Fibrillation in Cardiac Surgery study [PACS(2)]). *American Journal of Cardiology*.87(7):881-5 2001.

**Leibman 1998**

Leibman BD, Dilliogluligil O, Abbas F, Tanli S, Kattan MW, Scardino PT. Impact of a clinical pathway for radical retropubic prostatectomy. *Urology* 1998;52(1):94-99.

**McKinsey 1999**

McKinsey KT, Boren DM, Fidellow JA. Navigate a clinical pathway for uncomplicated MI patients. *Nursing management* 1999;30(10):33-35.

**Melbert 2002**

Melbert RB, Kimmins MH, Isler JT, Billingham RP, Lawton D, Salvadalena G, Cortezzo M, Rowbotham R. Use of a critical pathway for colon resections. *Journal of Gastrointestinal Surgery*.6(5):745-52 2002:Oct.

**Metersky 2001**

Metersky ML, Fine JM, Tu GS, Mathur D, Weingarten S, Petrillo MK, Meehan TP. Lack of effect of a pneumonia clinical pathway on hospital-based pneumococcal vaccination rates. *American Journal of Medicine* 2001;110(2):141-143.

**Miller 2002** Miller PR, Fabian TC, Croce MA, Magnotti LJ, Pritchard FE, Minard G, Stewart RM. Improving outcomes following penetrating colon wounds: Application of a clinical pathway. *Annals of Surgery* 2002;235(6):775-781.

**Nanly 2005**

Nanly H, Chen BTH, Lee LL, Chung MH, Lin PC. A comparison of the quality of nursing care between pre- and postimplementing of a clinical pathway. *Journal of Clinical Nursing* 2005;14(10):1260-1261.

**O'Brien 2000**

O'Brien SV, Hardy KJ. Impact of a care pathway-driven diabetes education programme. *Journal of Diabetes Nursing* 2000;4(5):147-9.

**Ogawa 2004**

Ogawa T, Terada A, Yamada Y, Ijichi K, Hasegawa Y, Fujimoto Y. The meaning clinical pathway of the operation for thyroid tumor and parotid tumor. *Practica Oto-Rhino-Laryngologica* 2004;97(6):555-561.

**Palmer 2000**

Palmer CS, Zhan C, Elixhauser A, Halpern MT, Rance L, Feagan BG, Marrie TJ. Pharmaceutical economics & health policy: economic assessment of the community-acquired pneumonia intervention trial employing levofloxacin (Structured abstract). *Clinical Therapeutics* 2000;22:250.

**Pearson 2000**

Pearson S, Moraw I, Maddern GJ. Clinical pathway management of total knee arthroplasty: a retrospective comparative study. *Australian & New Zealand Journal of Surgery*.70(5):351-4 2000.

**Pearson 2001**

Pearson SD, Kleefield SF, Soukop JR, Cook EF, Lee TH. Critical pathways intervention to reduce length of hospital stay. [see comments]. *American Journal of Medicine* 2001;110(3):175-180.

**Perry 2003**

Perry L, McLaren S. Nutritional support in acute stroke: the impact of evidence-based guidelines. *Clinical Nutrition*.22(3):283-93 2003.

**Pestian 1998**

Pestian JP, Derkay CS, Ritter C. Outpatient tonsillectomy and adenoidectomy clinical pathways: an evaluative study. *American Journal of Otolaryngology* 1998;19(1):45-49.

**Peter 2004** Peter S, Fazakerley M. Clinical effectiveness of an integrated care pathway for infants with bronchiolitis. *Paediatric nursing* 2004;16(1):30-35.

**Porter 1998**

Porter HB. Health resource utilization and quality of life outcomes of low-risk coronary artery bypass graft patients: a comparison study. *Canadian Journal of Cardiovascular Nursing* 1998;9(1):10-15.

**Pritts 1999**

Pritts TA, Nussbaum MS, Flesch LV, Fegelman EJ, Parikh AA, Fischer JE. Implementation of a clinical pathway decreases length of stay and cost for bowel resection. *Annals of Surgery* 1999;230(5):728-733.

**Pronovost 2002**

Pronovost PJ, Jenckes M, To M, Dorman T, Lipsett PA, Berenholtz S, Bass EB. Reducing failed extubations in the intensive care unit. *Joint Commission Journal on Quality Improvement*.28(11):595-604 2002.

**Ranjan 2003**

Ranjan A, Tarigopula L, Srivastava RK, Obasanjo OO, Obah E. Effectiveness of the clinical pathway in the management of congestive heart failure. *Southern medical journal* 2003;96(7):661-663.

**Riegel 1996**

Riegel B, Gates DM, Gocka I, Medina L, Odell C, Rich M, Finken JS. Effectiveness of a program of early hospital discharge of cardiac surgery patients.[see comment][erratum appears in *J Cardiovasc Nurs* 1997 Apr;11(3):1]. *Journal of Cardiovascular Nursing*.11(1):63-75 1996.

**Roberts 2004**

Roberts HC, Pickering RM, Onslow E, Clancy M, Powell J, Roberts A, Hughes K, Coulson D, Bray J. The effectiveness of implementing a care pathway for femoral neck fracture in older people: a prospective controlled before and after study. *Age and Ageing* 2004;33(2):178-84.

**Roman 2001**

Roman SH, Chassin MR. Windows of opportunity to improve diabetes care when patients with diabetes are hospitalized for other conditions. *Diabetes Care*.24(8):1371-6 2001.

**Ross 1997**

Ross G, Johnson D, Kobernick M. Evaluation of a critical pathway for stroke.[see comment]. *Journal of the American Osteopathic Association*.97(5):269-272, 275-6 1997.

**Ross 2004**

Ross MA, Davis B, Dresselhouse A. The Role of an Emergency Department Observation Unit in a Clinical Pathway for Atrial Fibrillation. *Critical Pathways in Cardiology* 2004;3(1):8-12.

### **Sanders 2002**

Sanders DS, Carter MJ, D'Silva J, James G, Bolton RP, Willemse PJ, Bardhan KD. Percutaneous endoscopic gastrostomy: a prospective audit of the impact of guidelines in two district general hospitals in the United Kingdom. *American Journal of Gastroenterology*.97(9):2239-45 2002.

### **Schriger 1997**

Schriger DL, Baraff LJ, Rogers WH, Cretin S. Implementation of clinical guidelines using a computer charting system. Effect on the initial care of health care workers exposed to body fluids.[see comment]. *JAMA*.278(19):1585-90 1997.

### **Short 1997**

Short MS. Charting by exception on a clinical pathway. *Nursing management* 1997;28(8):45-46.

### **Smith 1999**

Smith DM, Gow P. Towards excellence in quality patient care: A clinical pathway for myocardial infarction. *Journal of Quality in Clinical Practice* 1999;19(2):103-105.

### **Stoller 1998**

Stoller JK, Mascha EJ, Kester L, Haney D. Randomized controlled trial of physician-directed versus respiratory therapy consult service-directed respiratory care to adult non-ICU inpatients. *American Journal of Respiratory & Critical Care Medicine* 1998;158(4):1068-1075.

### **Stone 2005**

Stone RA, Mor MK, Lave JR, Hough LJ, Fine MJ. Implementation of an inpatient management and discharge strategy for patients with community-acquired pneumonia. *American Journal of Managed Care*.11(8):491-9 2005.

### **Summers 1998**

Summers D, Soper PA. Implementation and evaluation of stroke clinical pathways and the impact on cost of stroke care. *Journal of Cardiovascular Nursing* 1998;13(1):69-87.

### **Thomas 2003**

Thomas K. Clinical pathway for hip and knee arthroplasty. *Physiotherapy* 2003;89(10):603-609.

**Turley 1994**

Turley K, Tyndall M, Roge C, Cooper M, Turley K, Applebaum M, Tarnoff H. Critical pathway methodology: effectiveness in congenital heart surgery. *Annals of Thoracic Surgery*.58(1):57-63; discussion 63-5 1994.

**Unemura 2002**

Unemura Y, Toriumi H, Nogi H, Saeki T, Shioya H, Misawa T, Yamazaki Y, Fujisaki J, Torii A. Introduction of a unique clinical pathway for colorectal polypectomy and analysis of its value. *Tokyo Jikeikai Medical Journal* 2002;117(6):419-426.

**Walsh 2001**

Walsh MD, Barry M, Scott TE, Lamorte WW, Menzoian JO. The role of a nurse case manager in implementing a critical pathway for infrainguinal bypass surgery. *Joint Commission Journal on Quality Improvement*.27(4):230-8 2001.

**Warner 2002**

Warner BW, Rich KA, Atherton H, Andersen CL, Kotagal UR. The sustained impact of an evidenced-based clinical pathway for acute appendicitis. *Seminars in Pediatric Surgery*.11(1):29-35 2002.

**Waters 1999**

Waters JB, Wolff RS, Blansfield J, Lamorte WW, Millham FH, Hirsch EF. Development and implementation of clinical pathways for the management of four trauma diagnoses. *Journal for Healthcare Quality*.21(3):4-11; quiz 11 1999:Jun.

**Wilson 2002**

Wilson SD, Dahl BB, Wells RD. An evidence-based clinical pathway for bronchiolitis safely reduces antibiotic overuse. *American Journal of Medical Quality*.17(5):195-9 2002:Oct.

**Yueh 2003**

Yueh B, Weaver EM, Bradley EH, Krumholz HM, Heagerty P, Conley A, Sasaki CT. A critical evaluation of critical pathways in head and neck cancer. *Archives of Otolaryngology - Head & Neck Surgery*.129(1):89-95 2003.
